# Supplementary material
Source: Springer Nature journal article supplement (https://www.springermedizin.de/resource/supplementary/12936_2014_3278_MOESM6_ESM.pdf/9545484)

## Risk of bias

## Applicability concerns

**Patient selection**  
**Index test**  
**Reference standard**  
**Flow and timing**

**Patient selection**  
**Index test**  
**Reference standard**

*Test performance*

Chinkhumba 2010

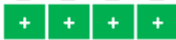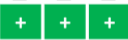

Ishengoma 2011

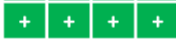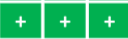

Lemma 2011

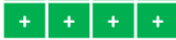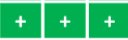

Mubi 2011

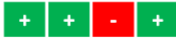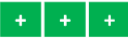

Premji 1994

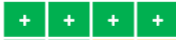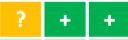

Ratsimbaoa 2012

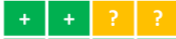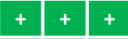

Tiono 2013

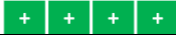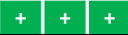

Supplement: MOESM6 [file 9545484]
